# Supplementary material
Source: Springer Nature journal article supplement (https://www.springermedizin.de/resource/supplementary/12885_2007_1124_MOESM2_ESM.pdf/9471170)

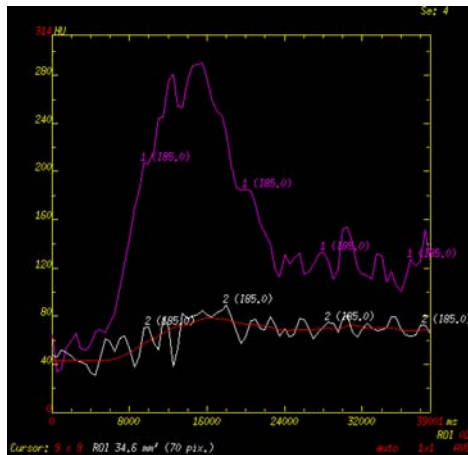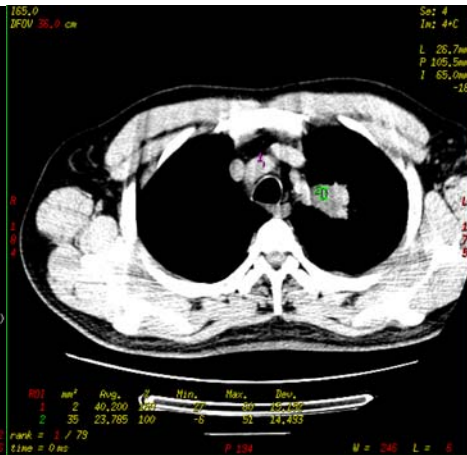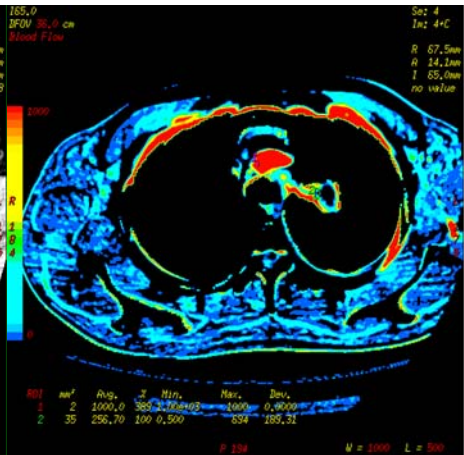

A

B

C

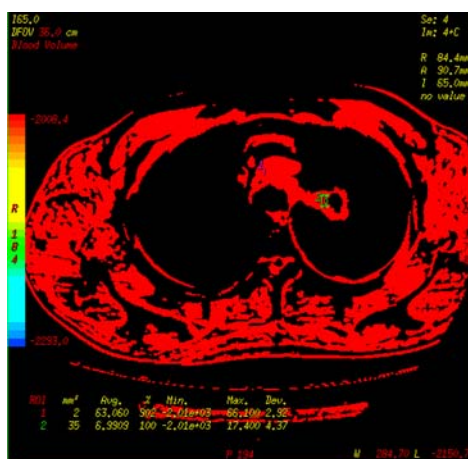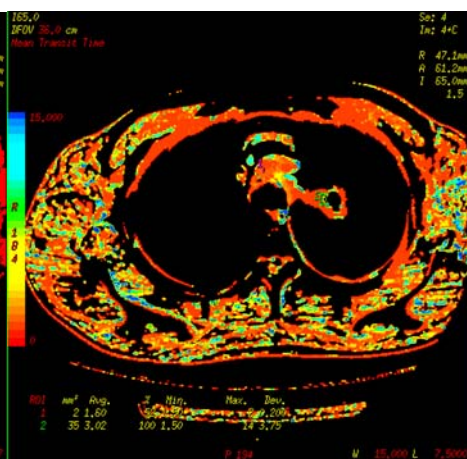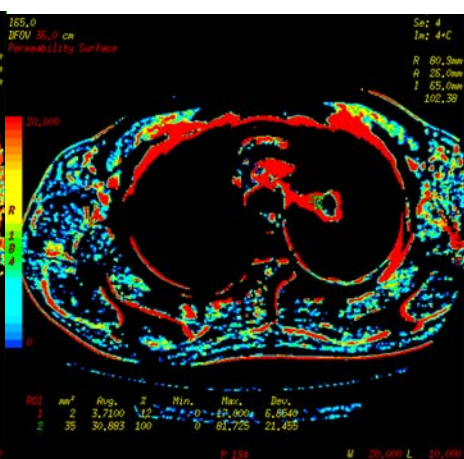

D

E

F

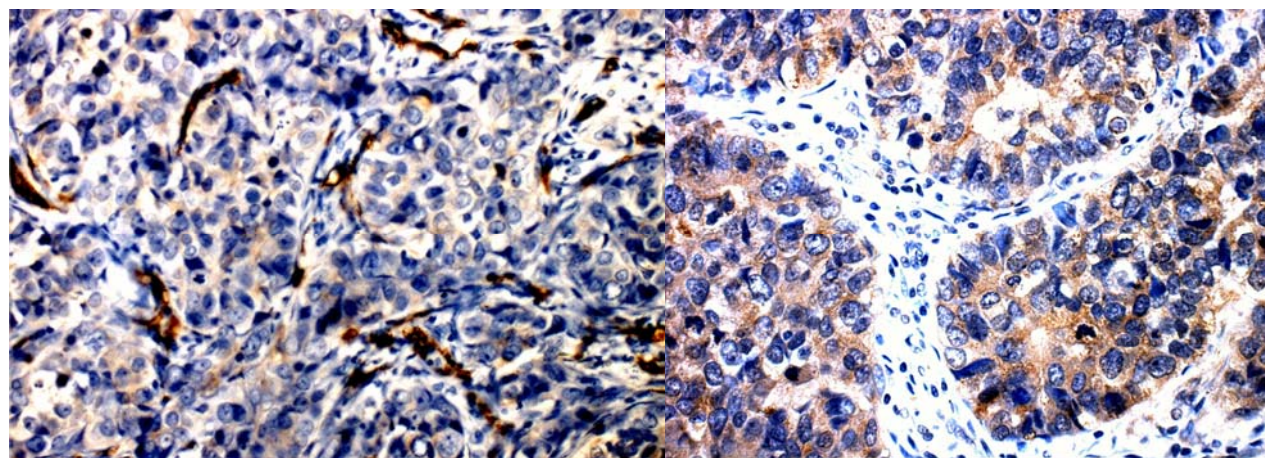

G

H

Supplement: MOESM2 [file 9471170]
